# Supplementary material for: Highly efficient visible-light-driven CO2 reduction to CO using a Ru(ii)–Re(i) supramolecular photocatalyst in an aqueous solution
Source: Royal Society of Chemistry journal article supplement (doi:10.1039/c5gc01720c), 2015-08-28
Supplement: c5gc01720c1.pdf [file c5gc01720c1.pdf]

# Highly efficient visible-light-driven CO<sub>2</sub> reduction to CO using a Ru(II)–Re(I) supramolecular photocatalyst in an aqueous solution

*Akinobu Nakada,<sup>a</sup> Kazuhide Koike,<sup>b,c</sup> Kazuhiko, Maeda,<sup>a</sup> and Osamu Ishitani\**

*a,c*

<sup>a</sup>Department of Chemistry, Graduate School of Science and Engineering, Tokyo Institute of Technology, 2-12-1-NE-1 O-okayama, Meguro-ku, Tokyo 152-8550, Japan.

<sup>b</sup>National Institute of Advanced Industrial Science and Technology, 16-1 Onogawa, Tsukuba 305-8569, Japan

<sup>c</sup>CREST, Japan Science and Technology Agency (JST), 4-1-8 Honcho, Kawaguchi, Saitama 332-0012, Japan

## Supporting Information

### General Procedure

IR spectra were measured at 1 cm<sup>-1</sup> resolution with a JASCO FT/IR-610 spectrophotometer. UV-vis absorption spectra were measured with a JASCO V-565 spectrophotometer. Emission spectra were measured at 298 ± 0.1 K with a JASCO FP-6500 spectrofluorometer. Emission lifetimes were measured with a Horiba FluoroCube 1000U-S time-correlated single-photon-counting system (the excitation source was a nano-LED 460, and the instrument response was less than 1 ns).

$^1\text{H}$  NMR spectra were measured in a  $\text{CD}_3\text{OD}$  solution using a JEOL ECA400II (400 MHz) system. Electrospray ionization–mass spectroscopy (ESI–MS) was performed with a Shimadzu LCMS-2010A system using HPLC-grade MeOH as a mobile phase.

Cyclic voltammograms were measured in an aqueous solution containing  $\text{Na}_2\text{SO}_4$  (0.1 M) as a supporting electrolyte; the voltammograms were collected using an ALS/CHI CHI-760ES electrochemical analyzer with a glassy-carbon disk working electrode (3 mm diameter), a Pt counter electrode, and an Ag/AgCl reference electrode. For mononuclear model complexes, cyclic voltammetry was conducted in MeCN containing  $\text{NEt}_4\text{BF}_4$  (0.1 M) with an Ag/AgNO<sub>3</sub> reference electrode was used instead of Ag/AgCl.

## Materials

Tap water was purified using a Millipore Elix Essential 3 UV system and was used the same day. Other materials were reagent-grade quality and were used without further purification.

## Synthesis

$\text{BI}(\text{CO}_2\text{H})\text{H}$ ,<sup>1</sup>  $\text{BI}^+(\text{CO}_2^-)$ ,<sup>1</sup> 4-methyl-2,2'-bipyridine (mmb),<sup>2</sup> and the bridging ligand (bpy-CH<sub>2</sub>-CH<sub>2</sub>-bpy)<sup>2</sup> were prepared using previously reported methods.  $\text{Re}\{\text{bpy}(\text{CH}_2\text{PO}_3\text{H}_2)_2\}(\text{CO})_3\text{Cl}$  (**Re**) was also synthesized according to the reported method.<sup>3</sup>

$[\text{Ru}(\text{dmb})_2(\text{mmb})]\text{Cl}_2 \cdot 5\text{H}_2\text{O}$ , **Ru**. A MeOH solution (50 mL) containing  $\text{Ru}(\text{dmb})_2\text{Cl}_2 \cdot 2\text{H}_2\text{O}$  (31 mg, 0.057 mmol) and mmb (11 mg, 0.063 mmol) was refluxed for 16 h. After MeOH was removed by evaporation, purification was performed using an ion-exchange column (SP Sephadex C-25, MeCN–water (1:1, v/v) containing  $\text{NH}_4\text{PF}_6$ ) to give  $[\text{Ru}(\text{dmb})_2(\text{mmb})](\text{PF}_6)_2$ . To the  $\text{PF}_6$  salts, 40 mL of EtOH–H<sub>2</sub>O (1:1, v/v) was added; the solution was subsequently treated with an Amberlite IRA-900J ion-exchange resin in Cl form.

Yield: 28 mg (0.037 mmol, 64%) Anal. Calcd for  $C_{33}H_{44}Cl_2N_6O_5Ru$ : C, 52.50; H, 5.54; N, 10.50. Found: C, 52.95; H, 5.12; N, 10.47.  $^1H$ -NMR (400 MHz, MeOH)  $\delta$  / ppm: 8.67 (d, 1H,  $J$  = 8.0 Hz), 8.56 (s, 5H), 8.08 (dd, 1H,  $J$  = 8.0 Hz, 7.4 Hz), 7.81 (d, 1H,  $J$  = 6.4 Hz), 7.61 (m, 5H), 7.45 (dd, 1H,  $J$  = 7.4 Hz, 6.4 Hz), 7.31 (m, 5H), 2.58 (s, 15H). ESI-MS (eluent: MeOH)  $m/z$ : 319 ( $[M - 2Cl]^{2+}$ ).

$[Ru(dmb)_2(bpy-CH_2-CH_2-bpy)Re(CO)_3Cl]Cl_2 \cdot 5H_2O$ , **RuRe**. An EtOH-MeOH (1:1, v/v) solution (50 mL) containing  $Ru(dmb)_2Cl_2 \cdot 2H_2O$  (60 mg, 0.11 mmol) and  $bpy-CH_2-CH_2-bpy$  (110 mg, 0.32 mmol) was refluxed for 12 h. After removal of the solvent by evaporation, water was added to the residue and the remaining  $bpy-CH_2-CH_2-bpy$  was removed by filtration. An  $NH_4PF_6$  saturated aqueous solution was added to the filtrate, and the precipitate was subsequently filtered to give  $[Ru(dmb)_2(bpy-CH_2-CH_2-bpy)](PF_6)_2$ . To the precipitate, an EtOH-acetone (4:1, v/v) mixed solution (50 mL) containing  $Re(CO)_3Cl$  (44 mg, 0.12 mmol) was added; the resulting mixture was then refluxed for 14 h. After removal of the solvent by evaporation, the residue was separated by column chromatography on SP Sephadex C-25 using a 1:1 mixed solution of MeCN-H<sub>2</sub>O (1:1, v/v) containing  $NH_4PF_6$  as an eluent and  $[Ru(dmb)_2(bpy-CH_2-CH_2-bpy)Re(CO)_3Cl](PF_6)_2$  was successfully isolated. To the  $PF_6$  salts, 40 mL of EtOH-H<sub>2</sub>O (1:1, v/v) was added; the solution was then treated with an Amberlite IRA-900J ion-exchange resin in the Cl form. Yield: 75 mg (0.059 mmol, 53%) Anal. Calcd for  $C_{49}H_{52}Cl_3N_8O_8ReRu$ : C, 46.17; H, 4.11; N, 8.79. Found: C, 46.17; H, 4.11; N, 8.80. FT-IR (MeCN)  $\nu_{CO}$  /  $cm^{-1}$ : 2022, 1917, 1898. ESI-MS (eluent: MeOH)  $m/z$ : 557 ( $[M - 2Cl]^{2+}$ ).

### Photocatalytic Reaction

Photocatalytic reaction solutions were prepared in 11-mL test tubes (*i.d.* = 8 mm) by mixing the following (A) and (B) solutions: (A) a 2 mL aqueous solution containing the metal complex (0.05 mM),  $BI(CO_2H)H$  (20 mM), and NaOH (0.1 M), which was bubbled

with Ar for 30 min; (B) a 2-mL aqueous solution containing metal complexes (0.05 mM) and NaOH (0.1 M), which was bubbled with CO<sub>2</sub> for 30 min. The head space of the test tube was purged with CO<sub>2</sub>. The solutions were irradiated using a merry-go-round irradiation apparatus at  $\lambda > 500$  nm with a high-pressure Hg lamp combined with a K<sub>2</sub>CrO<sub>4</sub> (30% w,  $d = 1$  cm) solution filter. Quantum yields of CO formation were determined by the following method. A solution prepared by the same procedures except for the concentration of the complex (0.3 mM) was placed in a quartz cubic cell (path length: 1 cm) and irradiated using an Asahi Spectra Co. Max-303 Xe lamp (300 W) combined with a 480-nm (FWHM = 10 nm) band-pass filter (Asahi Spectra Co., light intensity =  $4.4 \times 10^{-9}$  einstein/s). Absorbed photons were counted by a Shimadzu QYM-01 apparatus, and 99% of the irradiated photons were absorbed by the reaction solution. The temperatures of the solutions were controlled at  $298 \pm 2$  K using an IWAKI CTS-134A constant-temperature system during irradiation. The gaseous reaction products, i.e., CO and H<sub>2</sub>, were analyzed by a GC-TCD (GL Science GC 323). HCOO<sup>-</sup> in the liquid phase was analyzed by following procedure: Ethyl acetate (2 mL) and HCl (1 mL, 36%) were added to 2 mL of the sample solution, followed by extraction; the ethyl acetate phase was then analyzed using a GC-BID (Shimadzu Tracera).

### **<sup>13</sup>CO<sub>2</sub> Labeling Experiment**

The <sup>13</sup>CO<sub>2</sub> labeling experiments were performed using 1 mL of an aqueous solution containing **RuRe** (0.05 mM) and BI(CO<sub>2</sub>H)H (10 mM) in an 8 mL test tube (*i.d.* = 1 cm). The test tube was degassed using the freeze–pump–thaw method, and then <sup>13</sup>CO<sub>2</sub> (99%, 609 mmHg) was introduced into it. GC–MS analyses were conducted using a Shimadzu GCMS-QP2010 Ultra combined with an MS-5A column for the gaseous phase and a TC-WAX column for the liquid phase.

### **Measurement of UV–vis Absorption Spectra of Ru During Irradiation**

A solution prepared by the same method for the photocatalytic reaction of **Ru** in a quartz cubic cell (path length: 1 cm) was irradiated using an Asahi Spectra Co. Max-303 Xe lamp (300 W) combined with a 480 nm (FWHM = 10 nm) band-pass filter purchased from Asahi Spectra Co. (the light intensity was  $4.6 \times 10^{-8}$  einstein/s). During irradiation, absorption spectra were measured using a Shimadzu QYM-01 apparatus. The temperatures of the solutions were controlled at  $298 \pm 2$  K using an IWAKI CTS-134A constant-temperature system during irradiation.

## Reference

- (1) Brunet, P.; Wuest, J. D. *Can. J. Chem.* 1996, **74**, 689.
- (2) Lepretre, J.-C.; Bar, B.; Chauvin, J.; Deronzier, A.; Lefebvre, B. *Inorg. Chem. Commun.* 2004, **7**, 47.
- (3) Nakada, A.; Koike, K.; Nakashima, T.; Morimoto, T.; Ishitani, O. *Inorg. Chem.* 2015, **54**, 1800.

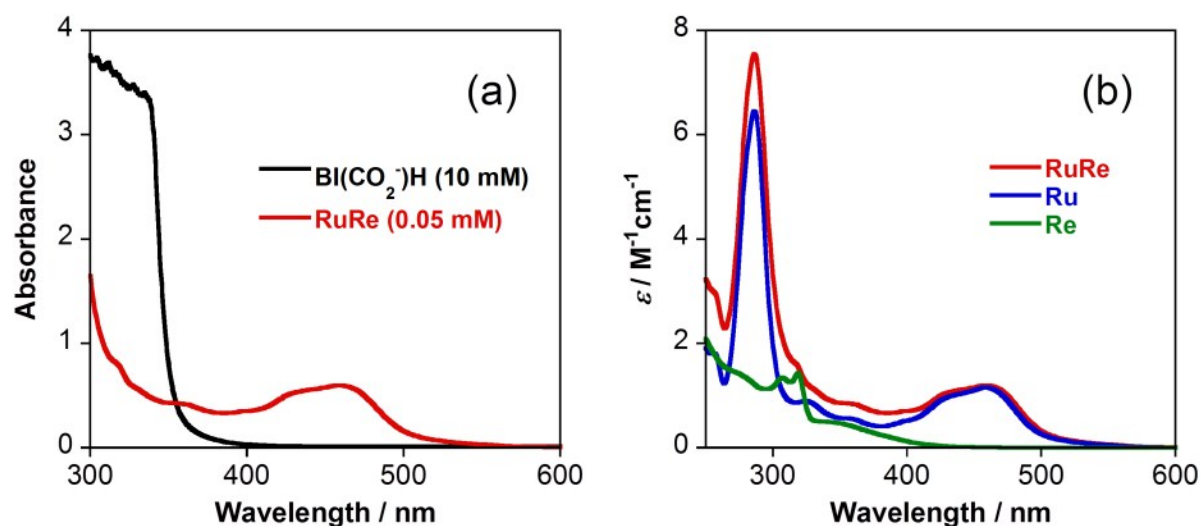

**Fig. S1** (a) UV-vis absorption spectra of (a) BI(CO<sub>2</sub><sup>-</sup>)H (10 mM, black) and **RuRe** (0.05 mM, red) in a NaOH (0.1 M) aqueous solution and (b) **RuRe** (red), a mononuclear model complex of the Ru(II) photosensitizer unit, [Ru(dmb)<sub>2</sub>(mmb)]<sup>2+</sup> (**Ru**; dmb: 4,4'-dimethyl bipyridine; mmb: 4-methyl bipyridine, blue), and a mononuclear model-complex of the Re(I) catalyst unit, Re{bpy(CH<sub>2</sub>PO<sub>3</sub>H<sub>2</sub>)<sub>2</sub>}(CO)<sub>3</sub>Cl (**Re**; bpy(CH<sub>2</sub>PO<sub>3</sub>H<sub>2</sub>)<sub>2</sub>: 4,4'-bis(methylphosphonic acid)-2,2'-bipyridine, green) in a NaOH (0.1 M) aqueous solution.

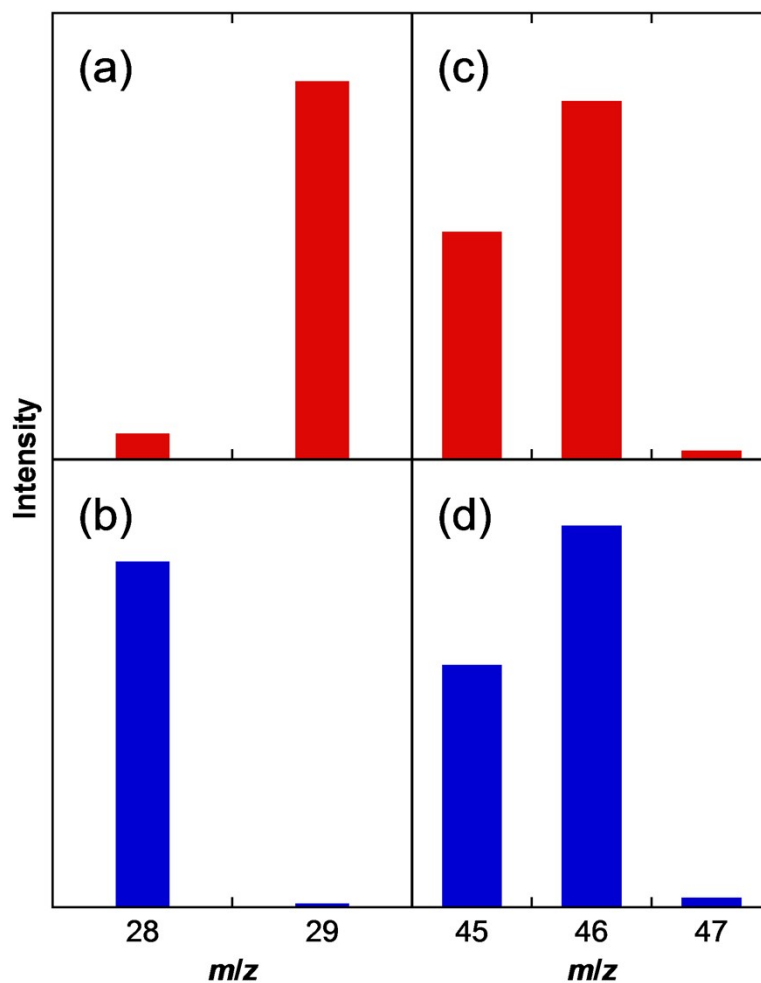

**Fig. S2** (a, b) GC–mass spectra attributed to CO (a) produced under a  $^{13}\text{CO}_2$  atmosphere and (b) under a  $^{12}\text{CO}_2$  atmosphere after 10 h of irradiation. (c, d) GC–mass spectra attributed to the formic acid and formate produced (c) under a  $^{13}\text{CO}_2$  atmosphere and (d) under a  $^{12}\text{CO}_2$  atmosphere after 10 h of irradiation. NaOH (0.1 M) aqueous solutions containing **RuRe** (0.05 mM) and  $\text{BI}(\text{CO}_2^-)\text{H}$  (10 mM) were irradiated at  $\lambda > 500$  nm light.

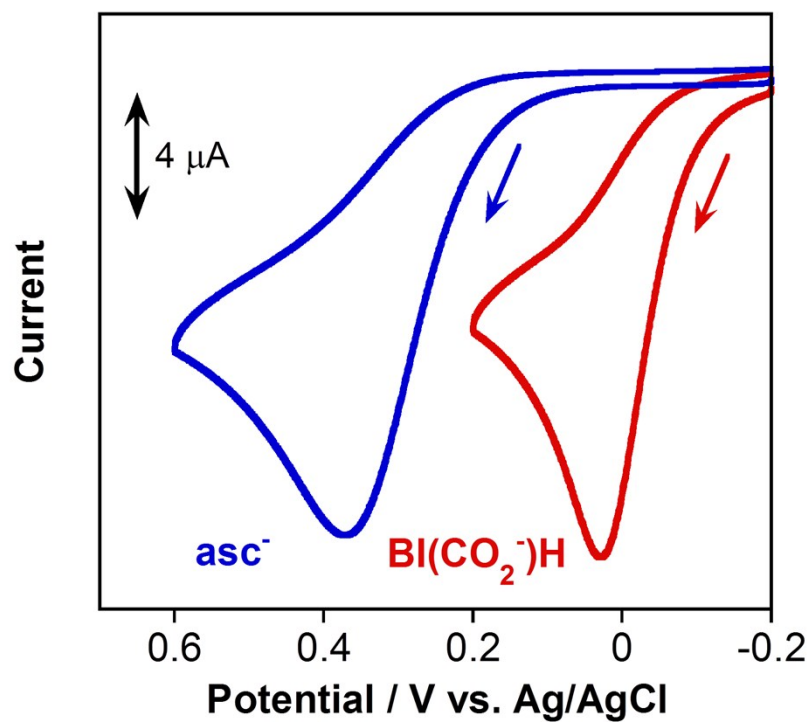

**Fig. S3** Cyclic voltammograms of  $\text{BI}(\text{CO}_2^-)\text{H}$  (red) and  $\text{asc}^-$  (blue) measured with an Ag/AgCl reference electrode in aqueous solutions containing  $\text{Na}_2\text{SO}_4$  (0.1 M) as a supporting electrolyte. The scan rate was  $100 \text{ mV}\cdot\text{s}^{-1}$ . An aqueous solution containing NaOH (0.1 M) was used for  $\text{BI}(\text{CO}_2^-)\text{H}$ .



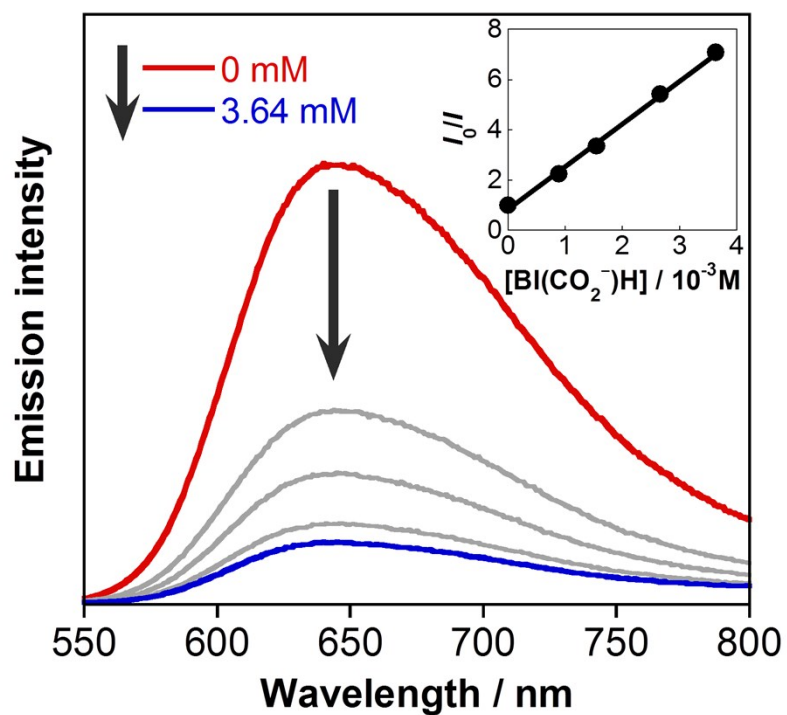

**Fig. S4** Emission spectra of **RuRe** in NaOH (0.1 M) aqueous solutions containing various concentrations (0–3.64 mM) of BI(CO<sub>2</sub><sup>-</sup>)H. The excitation wavelength was 456 nm. The inset shows the Stern–Volmer plots for the emission quenching.

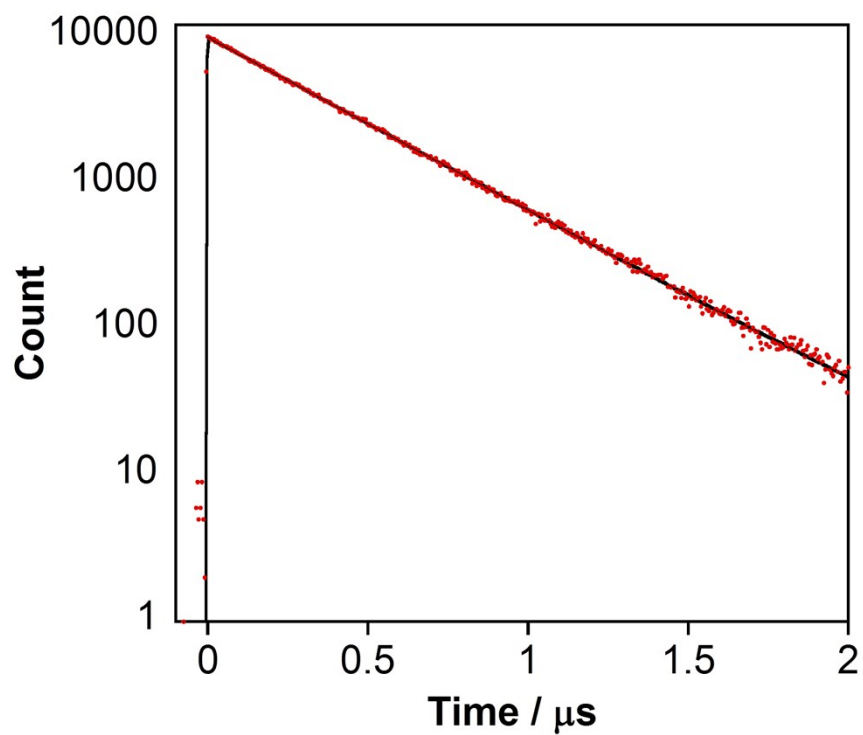

**Fig. S5** Decay of emission from **RuRe** (red) excited at  $\lambda_{\text{ex}} = 456$  nm and observed at  $\lambda_{\text{em}} = 630$  nm in a NaOH (0.1 M) aqueous solution under an Ar atmosphere. The data was fitted with a single exponential function (black).

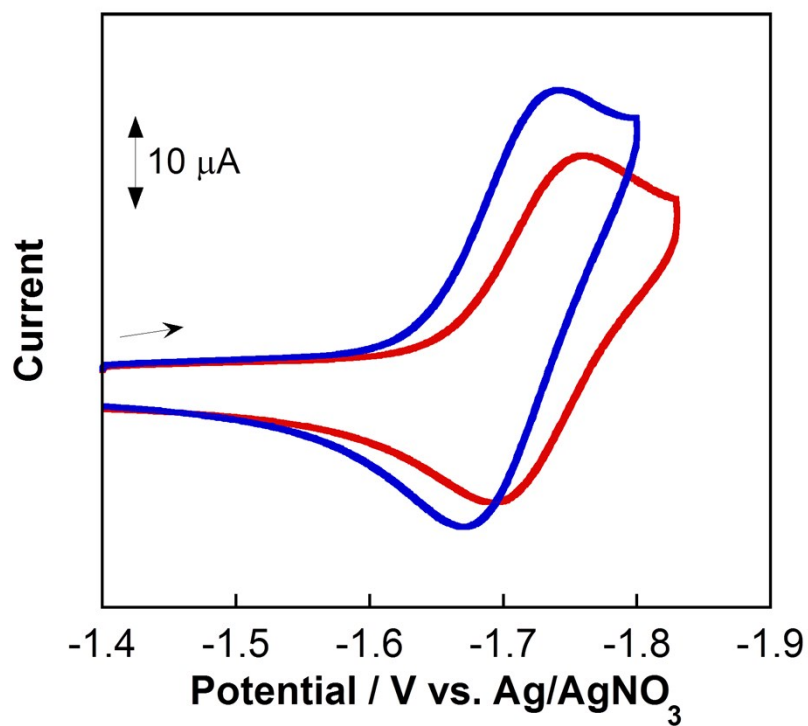

**Fig. S6** Cyclic voltammograms of **Ru** (red) and Re(mmb)(CO)<sub>3</sub>Cl (blue) measured with an Ag/AgNO<sub>3</sub> reference electrode in MeCN solutions containing NEt<sub>4</sub>BF<sub>4</sub> (0.1 M) as a supporting electrolyte. The scan rate was 200 mV·s<sup>-1</sup>.

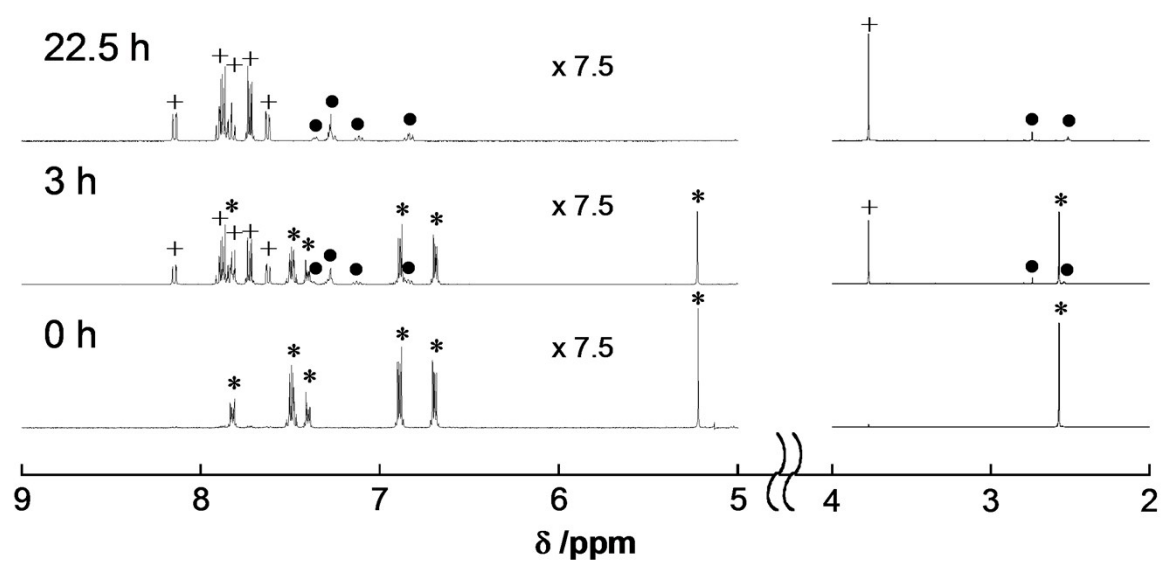

**Fig. S7**  $^1\text{H}$  NMR spectra of  $\text{BI}(\text{CO}_2^-)\text{H}$  (\*),  $\text{BI}^+(\text{CO}_2^-)$  (+), and other product(s) (•) after the photocatalytic reaction: an NaOD (0.1 M)– $\text{D}_2\text{O}$  solution containing **RuRe** (0.05 mM) and  $\text{BI}(\text{CO}_2\text{H})\text{H}$  (10 mM) was irradiated at  $\lambda_{\text{ex}} > 500$  nm under a  $\text{CO}_2$  atmosphere (0, 3, and 22.5 h).

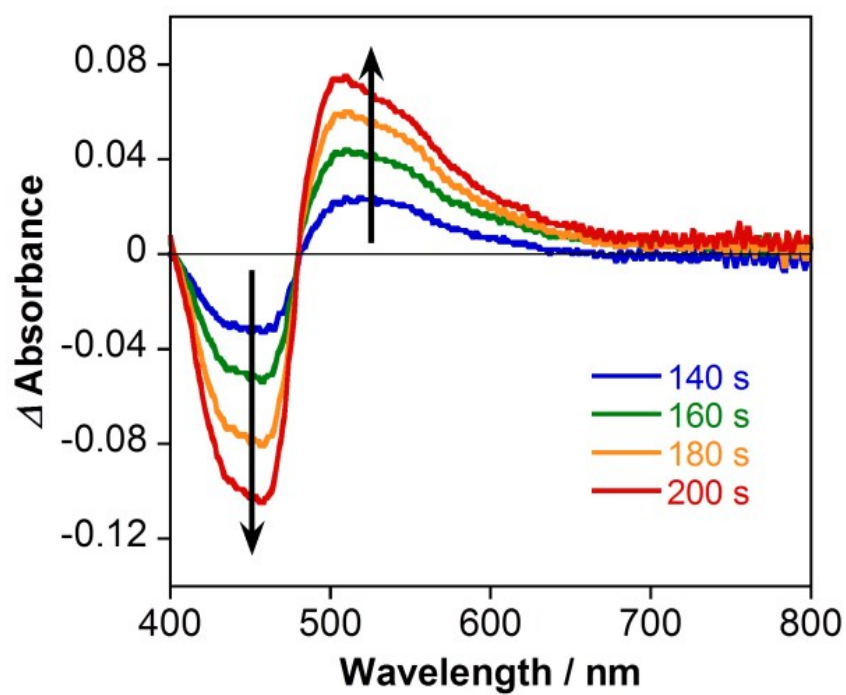

**Fig. S8** Differential UV-vis absorption spectra of a NaOH (0.1 M) aqueous solution containing **Ru** (0.05 mM) and BI(CO<sub>2</sub>)<sup>-</sup>H (10 mM) during irradiation (140–200 s) at  $\lambda_{\text{ex}} = 480$  nm ( $4.6 \times 10^{-8}$  einstein s<sup>-1</sup>).
